# Supplementary material
Source: PubMed Central journal article supplement (PMC3001503)
Supplement: 090707_3.pdf [file 090707_3.pdf]

**Appendix 3 (as submitted by the authors):** Boxplots displaying the minimum, maximum, the lower and upper quartiles, as well as the median for mean arterial pressure and norepinephrine doses for patients in the hydrocortisone and placebo groups among the whole study population (Panels A and B), among nonresponders to corticotropin (Panels C and D) and among responders to corticotropin (Panels E and F).

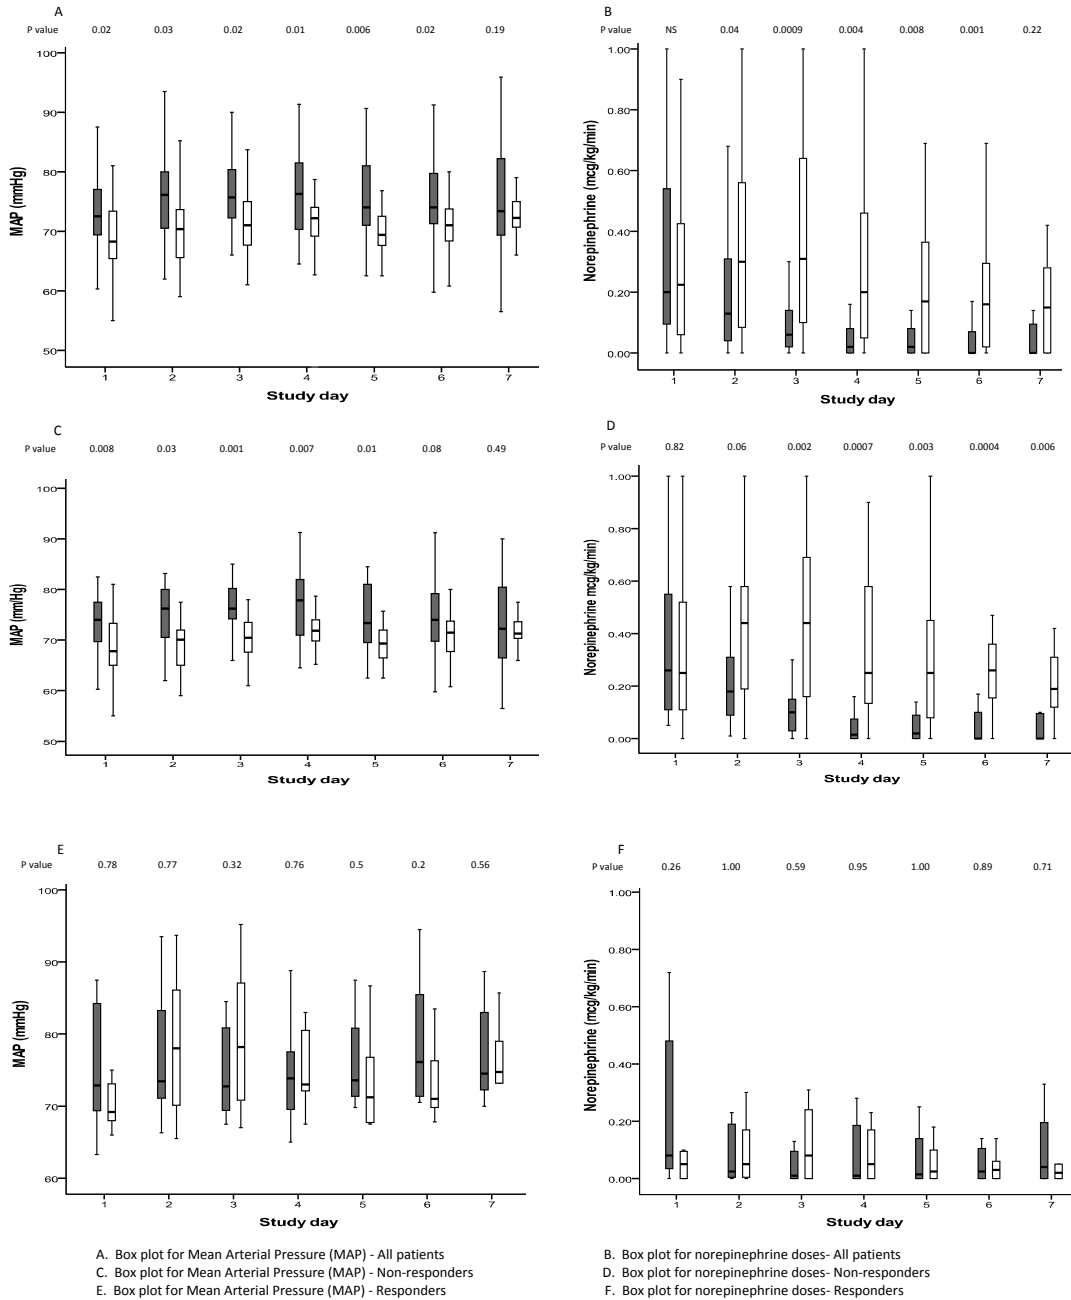

**Appendix to:** Arabi YM, Aljumah A, Dabbagh O, et al. Low-dose hydrocortisone in patients with cirrhosis and septic shock: a randomized controlled trial. *CMAJ* 2010. DOI:10.1503/cmaj.090707.
